# Supplementary material
Source: PubMed Central journal article supplement (PMC4519746)
Supplement: EC.00058-15_zek999094460so1.pdf [file EC.00058-15_zek999094460so1.pdf]

## Supplemental information

### Supplemental Figure Legends

#### Figure A1. Phylogram of cathepsins.

A maximum likelihood phylogeny of aspartyl and cysteine cathepsins in *T. thermophila*, together with the most highly related homologs (as judged by BLAST scores) present in a variety of organisms from the other major eukaryotic lineages. This figure represents an extended version of Figure 1B.

#### Figure A2. Primary sequence alignment of Cathepsin 4 (Cth4p) of *T. thermophila* with *H. sapiens* Cathepsin C

Conserved catalytic motifs are highlighted in red. Conserved active site residues C, H, N are marked by arrows. GenBank™ Accession Number of *Tetrahymena* CTH4 is XM\_001023356. UniProtKB/Swiss-Prot number of human cysteine protease (CTHC) is P53634.

**Table S1.** Master Primer list

| Nam | Description                    | 5'-Sequence-3'                                              |
|-----|--------------------------------|-------------------------------------------------------------|
| 01A | CTH4 Forward                   | CACCATGGTTAAAAGTAGATTAGCTGC                                 |
| 01B | CTH4 Reverse                   | TTATTTTCTTTTAGATTTTCAACAAAGTATTTG                           |
| 02A | CTH4 KO 5'UTR-Forward          | GGGAACAAAAGCTGGCCATTACTTGTAACATATTATTTTATGAGGGTTTG          |
| 02B | CTH4 KO 5'UTR-Reverse          | CCGCCACCGCGGTGGTCTTTCAATATTTTATTTAATTTTGTGGTTCG             |
| 03A | CTH4 KO 3'UTR-Forward          | TACCGTCGACCTCGAGAAAACAACACCTGCAACATTATTAACC                 |
| 03B | CTH4 KO 3'UTR-Reverse          | CGGGCCCCCCTCGAGGAAAATGATAGAACTTTTGACTGATTGGG                |
| 04A | CTH4 Forward RT PCR            | ATGGTAAAAGTAGATTAGCTGC                                      |
| 04B | CTH4 Reverse RT PCR            | GAGAGCAAACAGATTTATATTATCCTG                                 |
| 05A | Sortilin3 Forward RT PCR       | ATGCGCTAGCGGATCTGCTAAAGACGATAGCAAAGAAAGAAC                  |
| 05B | Sortilin3 Reverse RT PCR       | TAGAAACCATGGATCCATTTCTAGGATCAAAGGATCTTCTTAC                 |
| 06A | CTH4 Forward (Endo)            | ATGCGCTAGCGGATCATGGTTAAAAGTAGATTAGCTGCAAT                   |
| 06B | CTH4 Reverse (Endo)            | TAGAAACCATGGATCCTTATTTTCTTTTAGATTTTCAACAAAGTATTTGTC         |
| 07A | CTH4 3'UTR-Forward (Endo)      | ATTCGATATCAAGCTTCGATTTCAGAAATACAAAGTTATTTTACATTTTG          |
| 07B | CTH4 3'UTR-Reverse (Endo)      | CGGTATCGATAAGCTTGGAATTTGTATGAACCACTAGATTC                   |
| 08A | CTH4 mutant Forward Cys352:Ala | GAAGATTGTGGAAGTGCATATGCTATTGCCACA                           |
| 08B | CTH4 mutant Reverse Cys352:Ala | TGTGGCAATAGCATATGCACTTCCACAATCTTC                           |
| 09A | CTH4 mutant Forward His505:Ala | TGGTAAAAGTTGATGCTTCAGTTCTCTGCTAT                            |
| 09B | CTH4 mutant Reverse His505:Ala | ATAGCAGAGAACTGAAGCATCAACTTTTACCA                            |
| 10A | CTH4-6His Forward              | CGTGTTTAAACATGGTTAAAAGTAGATTAGCTGC                          |
| 10B | CTH4-6His Reverse              | TTGGGCCCTCAATGATGATGATGATGATGTTATTTTCTTTTAGATTTTCAACAAAGTAT |

**Table S2.** Accession numbers from which Cathepsin sequences were obtained to create the phylogeny in Figure1B and A1

| <b>Organism</b>                                | <b>Abbreviation</b> | <b>Accession</b> | <b>Definition</b>                                                 |
|------------------------------------------------|---------------------|------------------|-------------------------------------------------------------------|
| <i>Toxoplasma gondii</i> ME49                  | Tg1                 | XP_002367480.1   | Eukaryotic aspartyl protease, putative                            |
| <i>Toxoplasma gondii</i> ME49                  | Tg2                 | XP_002365394.1   | Eukaryotic aspartyl protease, putative                            |
| <i>Toxoplasma gondii</i> ME49                  | Tg3                 | XP_002367043.1   | Eukaryotic aspartyl protease, putative                            |
| <i>Toxoplasma gondii</i> ME49                  | Tg4                 | TGME49_272510    | Aspartyl protease                                                 |
| <i>Toxoplasma gondii</i> ME49                  | Tg5                 | XP_002367300.1   | Cysteine proteinase, putative                                     |
| <i>Toxoplasma gondii</i> ME49                  | Tg6                 | XP_002371619.1   | Cathepsin C2 (TgCPC2)                                             |
| <i>Toxoplasma gondii</i> ME49                  | Tg7                 | EPT32244.1       | Cathepsin CPL                                                     |
| <i>Plasmodium falciparum</i> 3D7               | P1                  | XP_001348248.1   | Plasmepsin IV                                                     |
| <i>Plasmodium falciparum</i>                   | P2                  | AAW71461.1       | Plasmepsin 4, partial                                             |
| <i>Plasmodium falciparum</i>                   | P3                  | AAW71459.1       | Plasmepsin 4, partial                                             |
| <i>Plasmodium falciparum</i>                   | P4                  | AAW71460.1       | Plasmepsin 4, partial                                             |
| <i>Plasmodium falciparum</i> 3D7               | P5                  | XP_001351190.1   | Plasmepsin VI                                                     |
| <i>Plasmodium knowlesi</i> strain H            | P6                  | XP_002258928.1   | Aspartyl protease                                                 |
| <i>Plasmodium falciparum</i>                   | P7                  | AAW71452.1       | Plasmepsin 2, partial                                             |
| <i>Plasmodium cynomolgi</i> strain B           | P8                  | XP_004222389.1   | Cathepsin C precursor                                             |
| <i>Plasmodium knowlesi</i> strain H            | P9                  | XP_002259168.1   | Cathepsin c precursor                                             |
| <i>Plasmodium vivax</i> Sal-1                  | P10                 | XP_001615284.1   | Cathepsin C precursor                                             |
| <i>Homo sapiens</i>                            | Hs1                 | AAI71897.1       | Pepsinogen 5, group I (pepsinogen A)                              |
| <i>Homo sapiens</i>                            | Hs2                 | NP_055039.1      | Pepsin A-5 preproprotein                                          |
| <i>Homo sapiens</i>                            | Hs3                 | NP_001073276.1   | Pepsin A-4 preproprotein                                          |
| <i>Homo sapiens</i>                            | Hs4                 | BAF84553.1       | Unnamed protein product                                           |
| <i>Homo sapiens</i>                            | Hs5                 | NP_001901.1      | Cathepsin E isoform a preproprotein                               |
| <i>Homo sapiens</i>                            | Hs6                 | NP_001900.1      | Cathepsin D preproprotein                                         |
| <i>Homo sapiens</i>                            | Hs7                 | NP_001901.1      | Cathepsin E isoform a preproprotein                               |
| <i>Homo sapiens</i>                            | Hs8                 | EAW59363.1       | Cathepsin C, isoform CRA_a                                        |
| <i>Homo sapiens</i>                            | Hs9                 | BAG58920.1       | Unnamed protein product                                           |
| <i>Arabidopsis thaliana</i>                    | A1                  | NP_193936.2      | Aspartyl protease family protein                                  |
| <i>Arabidopsis thaliana</i>                    | A2                  | CAA18108.1       | Aspartic proteinase like protein                                  |
| <i>Arabidopsis thaliana</i>                    | A3                  | NP_172655.1      | Aspartic proteinase A1                                            |
| <i>Arabidopsis lyrata</i> subsp. <i>lyrata</i> | A4                  | XP_002892661.1   | Aspartyl protease family protein                                  |
| <i>Arabidopsis thaliana</i>                    | A5                  | NP_176419.2      | Aspartic proteinase A2                                            |
| <i>Arabidopsis lyrata</i> subsp. <i>lyrata</i> | A6                  | XP_002872693.1   | Aspartyl protease family protein                                  |
| <i>Arabidopsis thaliana</i>                    | A7                  | NP_192355.1      | Aspartic proteinase A3                                            |
| <i>Arabidopsis lyrata</i> subsp. <i>lyrata</i> | A8                  | XP_002889395.1   | Hypothetical protein ARALYDRAFT_887368                            |
| <i>Arabidopsis thaliana</i>                    | A9                  | NP_563648.1      | Putative cathepsin B-like cysteine protease                       |
| <i>Arabidopsis thaliana</i>                    | A10                 | NP_567215.1      | Putative cathepsin B-like cysteine protease                       |
| <i>Tetrahymena thermophila</i>                 | CTH1                | XP_001014915.1   | Eukaryotic aspartyl protease family protein (macronuclear)        |
| <i>Tetrahymena thermophila</i>                 | CTH2                | XP_001008250.2   | Eukaryotic aspartyl protease family protein (macronuclear)        |
| <i>Tetrahymena thermophila</i>                 | CTH3                | XP_001012968.1   | Eukaryotic aspartyl protease family protein (macronuclear)        |
| <i>Tetrahymena thermophila</i>                 | CTH4                | XP_001023356.1   | Papain family cysteine protease containing protein (macronuclear) |
| <i>Tetrahymena thermophila</i>                 | Tt1                 | XP_001016313.1   | Eukaryotic aspartyl protease family protein (macronuclear)        |

|                                           |              |                |                                                                   |
|-------------------------------------------|--------------|----------------|-------------------------------------------------------------------|
| <i>Tetrahymena thermophila</i>            | Tt2          | XP_001017733.1 | Eukaryotic aspartyl protease family protein (macronuclear)        |
| <i>Tetrahymena thermophila</i>            | Tt3          | XP_001027456.1 | Eukaryotic aspartyl protease family protein (macronuclear)        |
| <i>Tetrahymena thermophila</i>            | Tt4          | XP_001030703.1 | Eukaryotic aspartyl protease family protein (macronuclear)        |
| <i>Tetrahymena thermophila</i>            | Tt5          | XP_001026655.1 | Eukaryotic aspartyl protease family protein (macronuclear)        |
| <i>Tetrahymena thermophila</i>            | Tt6          | XP_001026656.1 | Eukaryotic aspartyl protease family protein (macronuclear)        |
| <i>Tetrahymena thermophila</i>            | Tt7          | XP_001010205.1 | Eukaryotic aspartyl protease family protein (macronuclear)        |
| <i>Tetrahymena thermophila</i>            | Tt8          | XP_001010694.1 | Eukaryotic aspartyl protease family protein (macronuclear)        |
| <i>Tetrahymena thermophila</i>            | Tt9          | XP_001010693.1 | Eukaryotic aspartyl protease family protein (macronuclear)        |
| <i>Tetrahymena thermophila</i>            | Tt10         | XP_001012969.1 | Hypothetical protein THERM_00321690 (macronuclear)                |
| <i>Tetrahymena thermophila</i>            | Tt11 (CTH30) | XP_001022323.1 | Papain family cysteine protease containing protein (macronuclear) |
| <i>Tetrahymena thermophila</i>            | Tt12 (CTH32) | XP_001029901.1 | Papain family cysteine protease containing protein (macronuclear) |
| <i>Tetrahymena thermophila</i>            | Tt13         | XP_001471259.1 | Cathepsin z (macronuclear)                                        |
| <i>Tetrahymena thermophila</i>            | Tt14         | XP_001015806.1 | Papain family cysteine protease containing protein (macronuclear) |
| <i>Tetrahymena thermophila</i>            | Tt15         | XP_001022043.1 | Papain family cysteine protease containing protein (macronuclear) |
| <i>Tetrahymena thermophila</i>            | Tt16         | XP_001031483.1 | Papain family cysteine protease containing protein (macronuclear) |
| <i>Tetrahymena thermophila</i>            | Tt17         | XP_001020178.1 | Papain family cysteine protease containing protein (macronuclear) |
| <i>Tetrahymena thermophila</i>            | Tt18 (CTHB)  | XP_001012594.1 | Papain family cysteine protease containing protein (macronuclear) |
| <i>Tetrahymena thermophila</i>            | Tt19         | XP_001015333.1 | Papain family cysteine protease containing protein (macronuclear) |
| <i>Paramecium tetraurelia strain d4-2</i> | Pt1          | XP_001452128.1 | Hypothetical protein (macronuclear)                               |
| <i>Paramecium tetraurelia strain d4-2</i> | Pt2          | XP_001459126.1 | Hypothetical protein (macronuclear)                               |
| <i>Paramecium tetraurelia strain d4-2</i> | Pt3          | XP_001453245.1 | Hypothetical protein (macronuclear)                               |
| <i>Paramecium tetraurelia strain d4-2</i> | Pt4          | XP_001454430.1 | Hypothetical protein (macronuclear)                               |
| <i>Paramecium tetraurelia strain d4-2</i> | Pt5          | XP_001456226.1 | Hypothetical protein (macronuclear)                               |
| <i>Paramecium tetraurelia strain d4-2</i> | Pt6          | XP_001442519.1 | Hypothetical protein (macronuclear)                               |
| <i>Paramecium tetraurelia strain d4-2</i> | Pt7          | XP_001452716.1 | Hypothetical protein (macronuclear)                               |
| <i>Paramecium tetraurelia strain d4-2</i> | Pt8          | XP_001438277.1 | Hypothetical protein (macronuclear)                               |
| <i>Paramecium tetraurelia strain d4-2</i> | Pt9          | XP_001455775.1 | Hypothetical protein (macronuclear)                               |
| <i>Paramecium tetraurelia strain d4-2</i> | Pt10         | XP_001431306.1 | Hypothetical protein (macronuclear)                               |
| <i>Paramecium tetraurelia strain d4-2</i> | Pt11         | XP_001429095.1 | Hypothetical protein (macronuclear)                               |
| <i>Paramecium tetraurelia strain d4-2</i> | Pt12         | XP_001459019.1 | Hypothetical protein (macronuclear)                               |
| <i>Paramecium tetraurelia strain d4-2</i> | Pt13         | XP_001448556.1 | Hypothetical protein (macronuclear)                               |
| <i>Ichthyophthirius multifiliis</i>       | Im1          | EGR30663.1     | WD repeat protein                                                 |
| <i>Ichthyophthirius multifiliis</i>       | Im2          | EGR30870.1     | Hypothetical protein IMG5_122010                                  |
| <i>Ichthyophthirius multifiliis</i>       | Im3          | EGR34063.1     | Hypothetical protein IMG5_024830                                  |
| <i>Ichthyophthirius multifiliis</i>       | Im4          | EGR29114.1     | Hypothetical protein IMG5_162980                                  |
| <i>Ichthyophthirius multifiliis</i>       | Im5          | EGR31334.1     | Hypothetical protein IMG5_112710                                  |
| <i>Ichthyophthirius multifiliis</i>       | Im6          | EGR32788.1     | Hypothetical protein IMG5_070700, partial                         |
| <i>Ichthyophthirius multifiliis</i>       | Im7          | EGR30116.1     | Hypothetical protein IMG5_141560                                  |
| <i>Ichthyophthirius multifiliis</i>       | Im8          | EGR34799.1     | Hypothetical protein IMG5_001760                                  |
| <i>Ichthyophthirius multifiliis</i>       | Im9          | EGR34889.1     | Nucleotide binding protein, putative                              |
| <i>Ichthyophthirius multifiliis</i>       | Im10         | EGR28345.1     | Hypothetical protein IMG5_177790                                  |
| <i>Ichthyophthirius multifiliis</i>       | Im11         | EGR34021.1     | Papain family cysteine protease, putative                         |



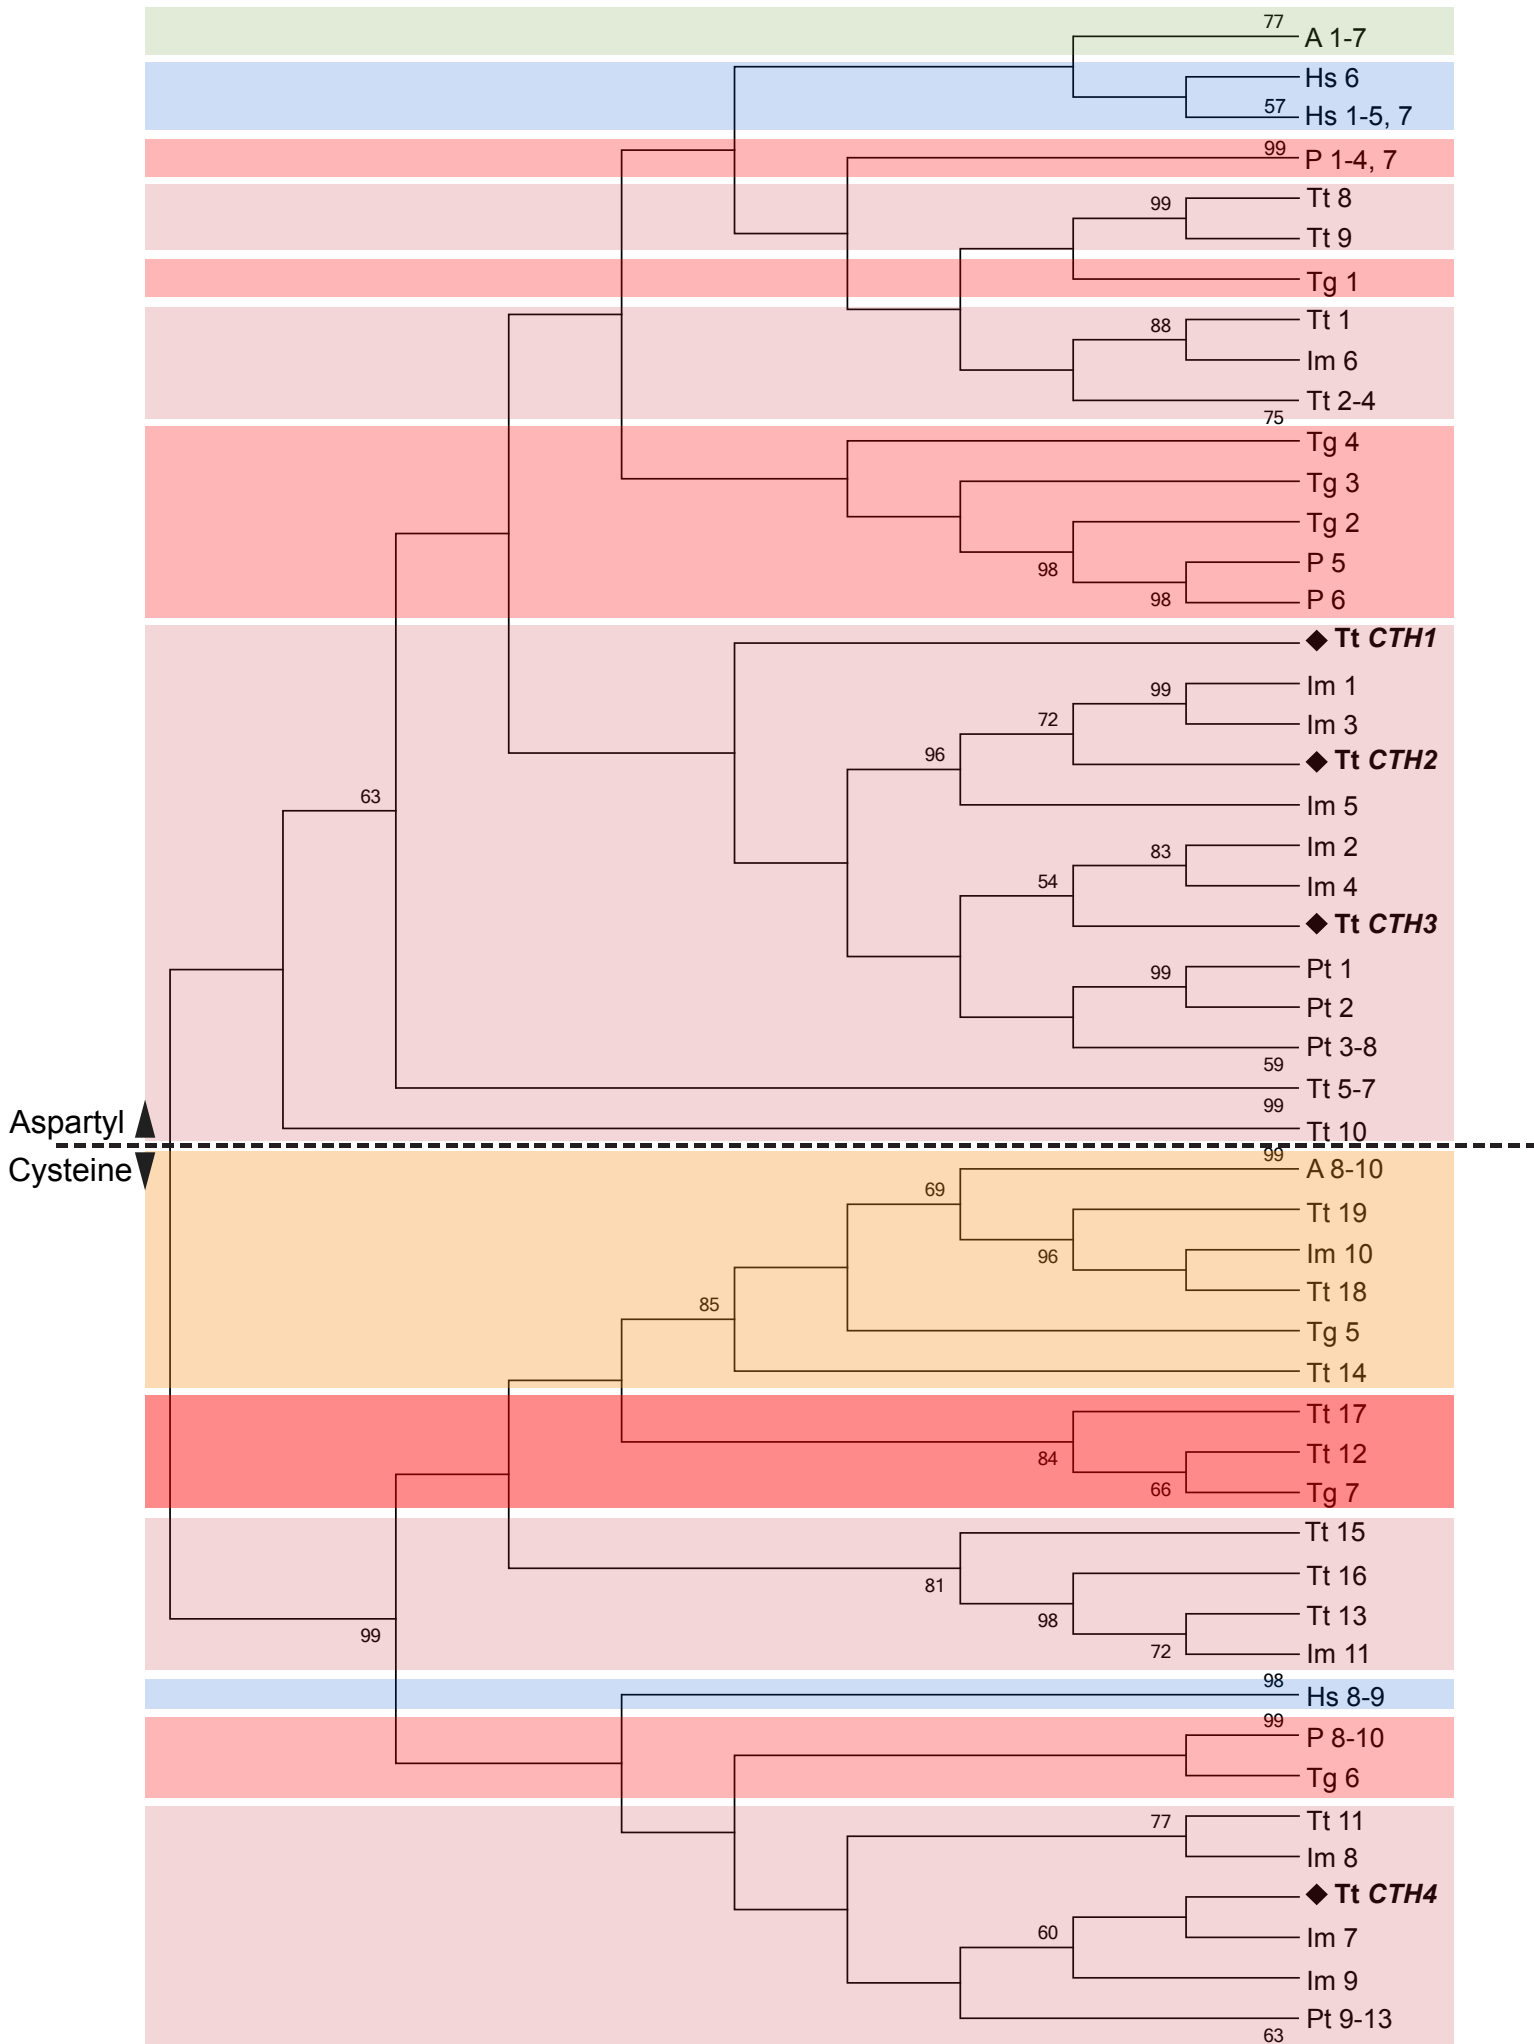

Color Key: ■ Plants ■ Animals ■ Ciliates ■ Apicomplexans ■ Ciliates and Apicomplexans ■ Ciliates, Apicomplexans, and Plants

```

hCTHC MGAGPSLLLAALLLLLSDGDVAVRCDTPANCTYLDLLGTWVFQVG---SSGSQRDVCN--- 54
TtCTH4 --MVKSRLAAILLLEFAVQSLLVQADLPVHCVRSQITGKWLLEKQKVLASSNNKPVSCGHQ 58
      * * * ** :    * : * * * : * : : * : * : : * : * : * : *
hCTHC -----SVMGPOEKKVVVYLQKLDATYDDLGNLSGHTIIYNQGFIEVLNDYKW 101
TtCTH4 IPDKAESSNSAMGGVLTVEVEYEYVFLDEDFTVRGKEGK-GRWTLVYDEGWEIEYNGVKY 117
      . * :    * : : * : * : : * . . . * : * : * : * : * : * * * . * :
hCTHC FAFFKYKEEGS-KVTTYCNETMTGWVHDLGRNWACFTGKVKGTASEN----- 148
TtCTH4 THFFKYAKDDSGQYKSVCSQTLVGWFNHIQKRSRGSQAIKADASQEFSDNVQQAHVVQP 177
      **** : : * : : : * : * : * : * : : : : . . * . * . : * : *
hCTHC -----VYVNI AHLKNSQE-----KYSNRLYKYDHN---- 173
TtCTH4 KETQYIFSEISSTMNKLSSQEQQKSKINASNLSLKRQQLSSSKNKFHQSIYLPHENVFA 237
      :    : : * . . * *          * : : : *    * :
hCTHC -----FVKAINAIQKS-WTATTYMEYETLTLGDMIRRSKGHSRKIIPRPKA 218
TtCTH4 QMKQTPATLLNHQEIVKRLNSIKGSTWQAKVPSFISKMSLEQMNTTRAGLRMDKPKFSYDN 297
      : * * : * * : * * * . . : : * : * * * : * ▼ .
hCTHC PLTAEIQQKILHLP-----TSWDWRNVHGIN-----FVSPVRNQASCGSCYSFAS 263
TtCTH4 KQGSFIQKSSSSLRGNKATTDYAHFSMENISDLPKSFDAWAEYIHAPRSQEDCGSCYAIAAT 357
      : * * : .    *        * : :    . . . * .          : : . * . * . * : : * :
hCTHC MGMLEARIRILTNNSQTPILSPQEVVSCSQYAQGCCEGGFPYLIAGKYAQDFGLVEEACFP 323
TtCTH4 TSMLSSRLWIKYGDN--TQLSPQHSLACNYNQCGDGGYGLVLS-KFYSEFEAVPESCHP 414
      . * * : * : * . . . * * * . : * . * * * * : * : * : * . * * * * .
hCTHC YTGTDS---PCKMKEDCFRYYSSEYHYVGGFYGGCNEALMKLELVHGHGPMVAFAFEVYDDF 380
TtCTH4 YEARDGQC�HCNVE SLSEVFTVTDYEYIGGSYKSTERLMMEIEYKNGPIVVSFEPKMF 474
      * . * .      * : : . . :    : * : * * ▼ * * . . * * * : : * : * * ▼ * * **
hCTHC LHYKKGIIYHHTGLRDPFN-----PFELTNHAVLLVGYGTDSASGMDYIWIKNSWGTGWG 434
TtCTH4 MYYNKGIYHSVDANQWIQNNNEENPVWQKVDHSVLCYGWGEDENG--KFWLLQNSWGEEWG 532
      : * : * * * * . . : : : : : : * : * * * * : * * . . : * : : * * * * **
hCTHC ENGYFRIRRGTTDECAIESIAVAATPIPKL----- 463
TtCTH4 ENGNFRMRRTDESNIEMGERANIVKTARKSPNTTEFSSTYSSHSKYFVEKSKRKQ 590
      *** * : * * * * . * * : .    * . :

```
